# Supplementary material for: The development of a method to produce diagnostic reagents using LaNiO3 nanospheres and their application in nanozyme-linked immunosorbent assay for the colorimetric screening of C-reactive protein with high sensitivity
Source: Royal Society of Chemistry journal article supplement (doi:10.1039/d4an01160k), 2024-01-01
Supplement: d4an01160k6.pdf [file d4an01160k6.pdf]



A

The image shows two test tubes, labeled A and B, containing dark, opaque liquids. The liquid in tube A is a dark brown color, while the liquid in tube B is a very dark, almost black color. Both tubes are filled to approximately the same level. The background is a light, neutral color.

B
