# Supplementary figures and images for: The development of a method to produce diagnostic reagents using LaNiO3 nanospheres and their application in nanozyme-linked immunosorbent assay for the colorimetric screening of C-reactive protein with high sensitivity
Source: Royal Society of Chemistry journal article supplement (doi:10.1039/d4an01160k), 2024-01-01

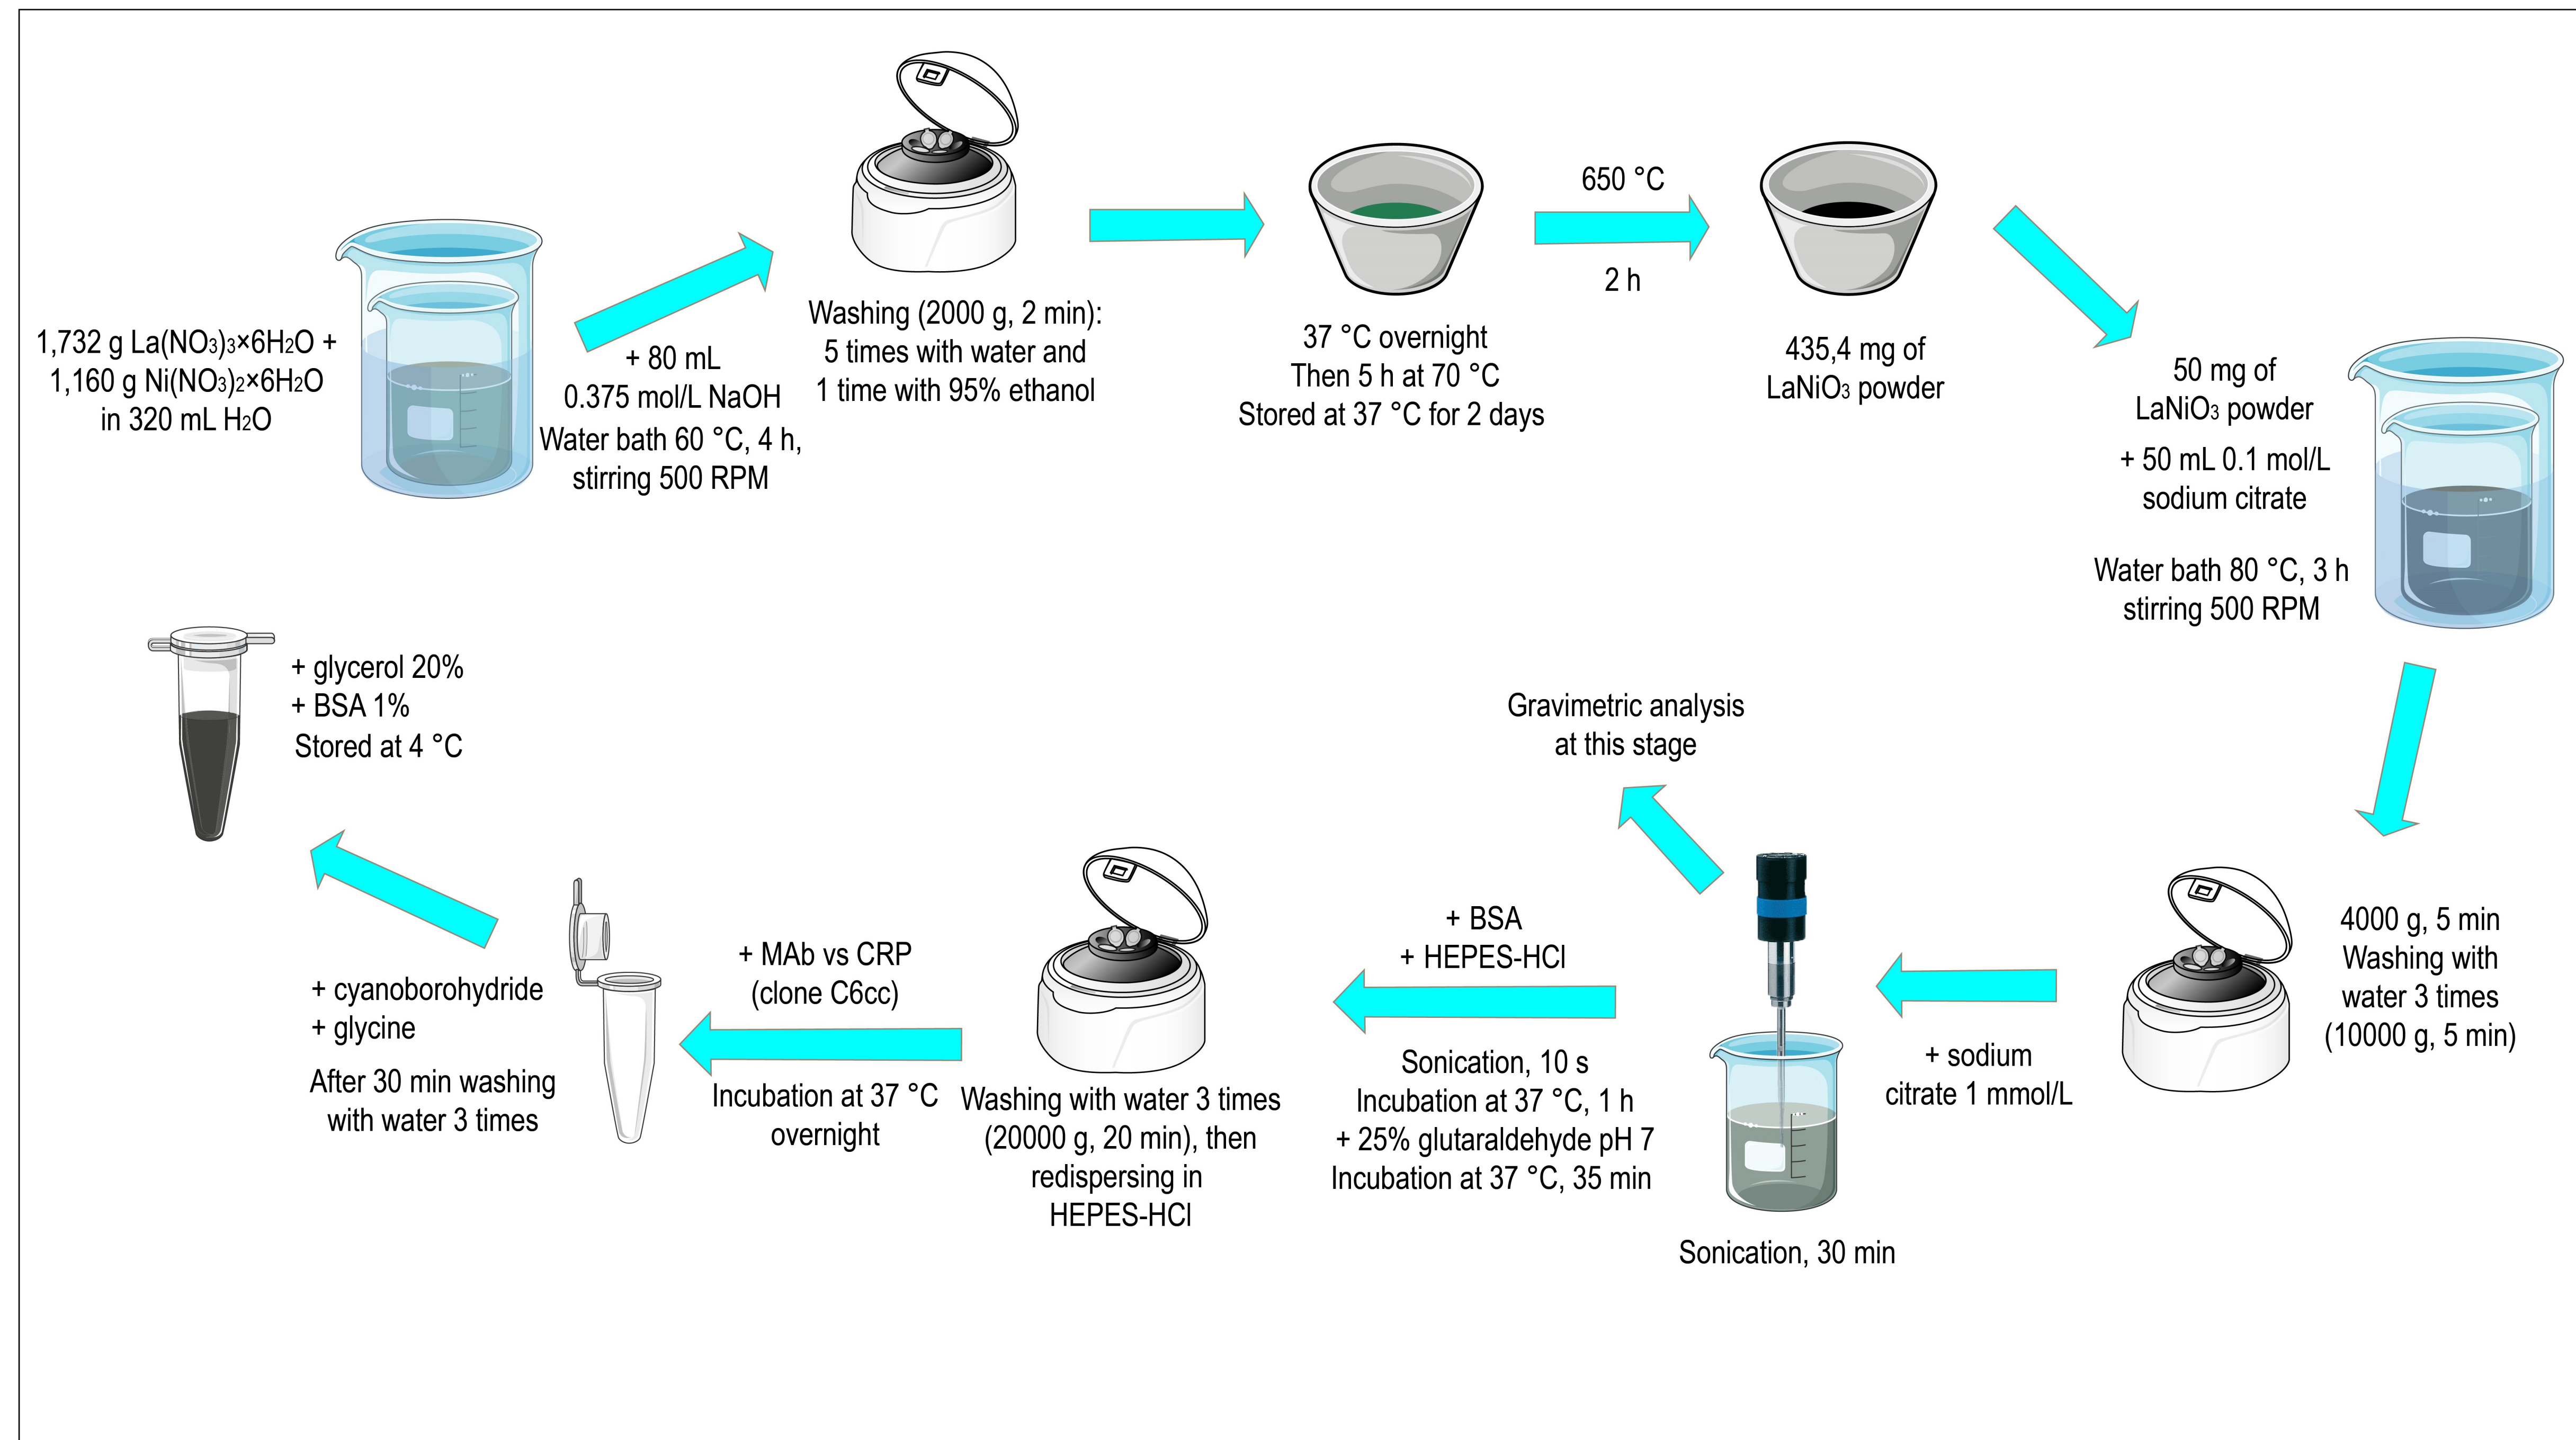

Supplement: d4an01160k2.pdf [file d4an01160k2.pdf]

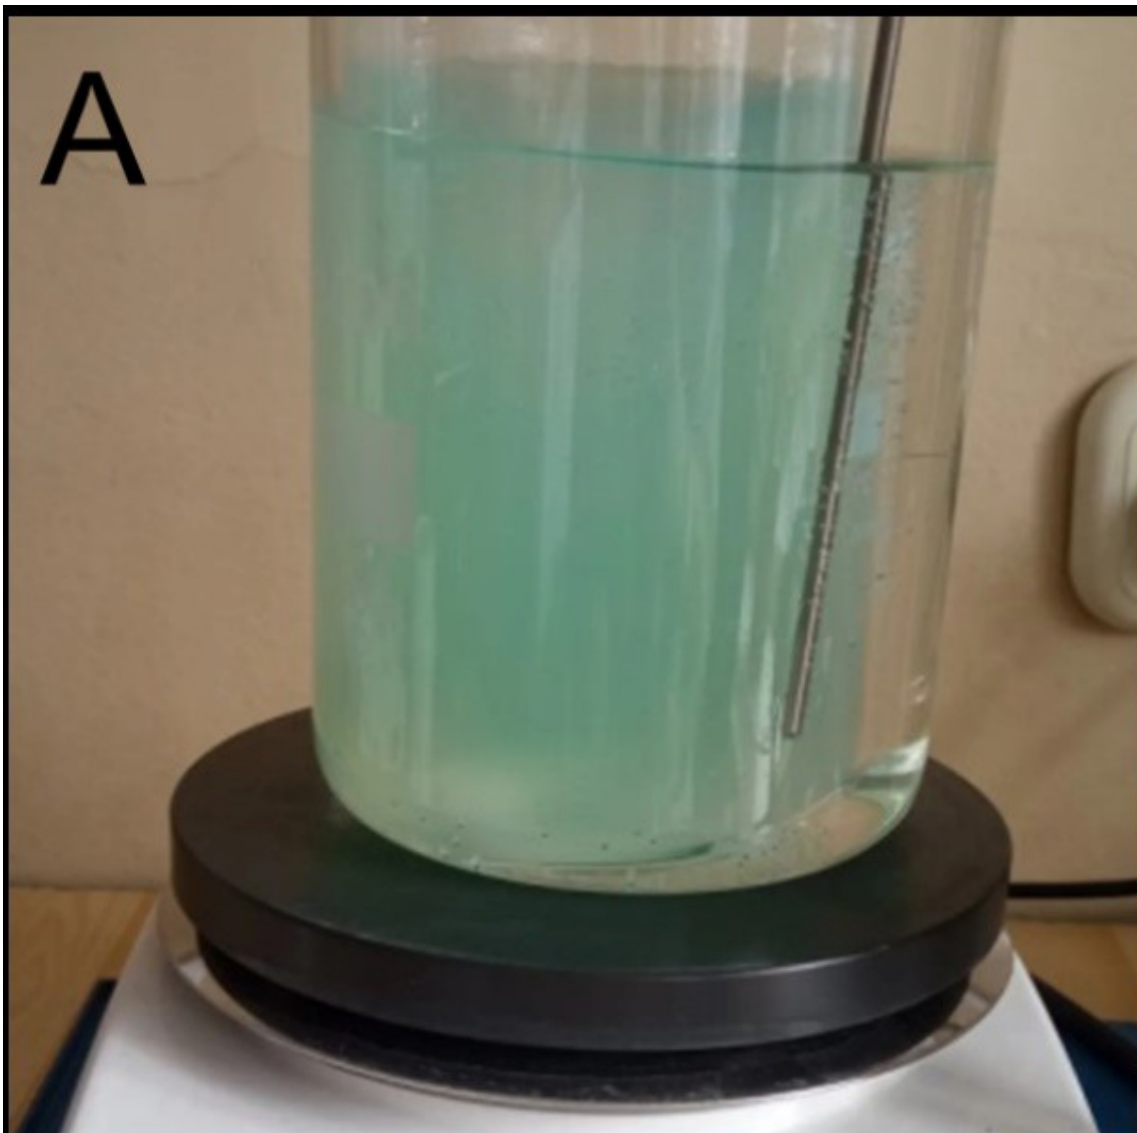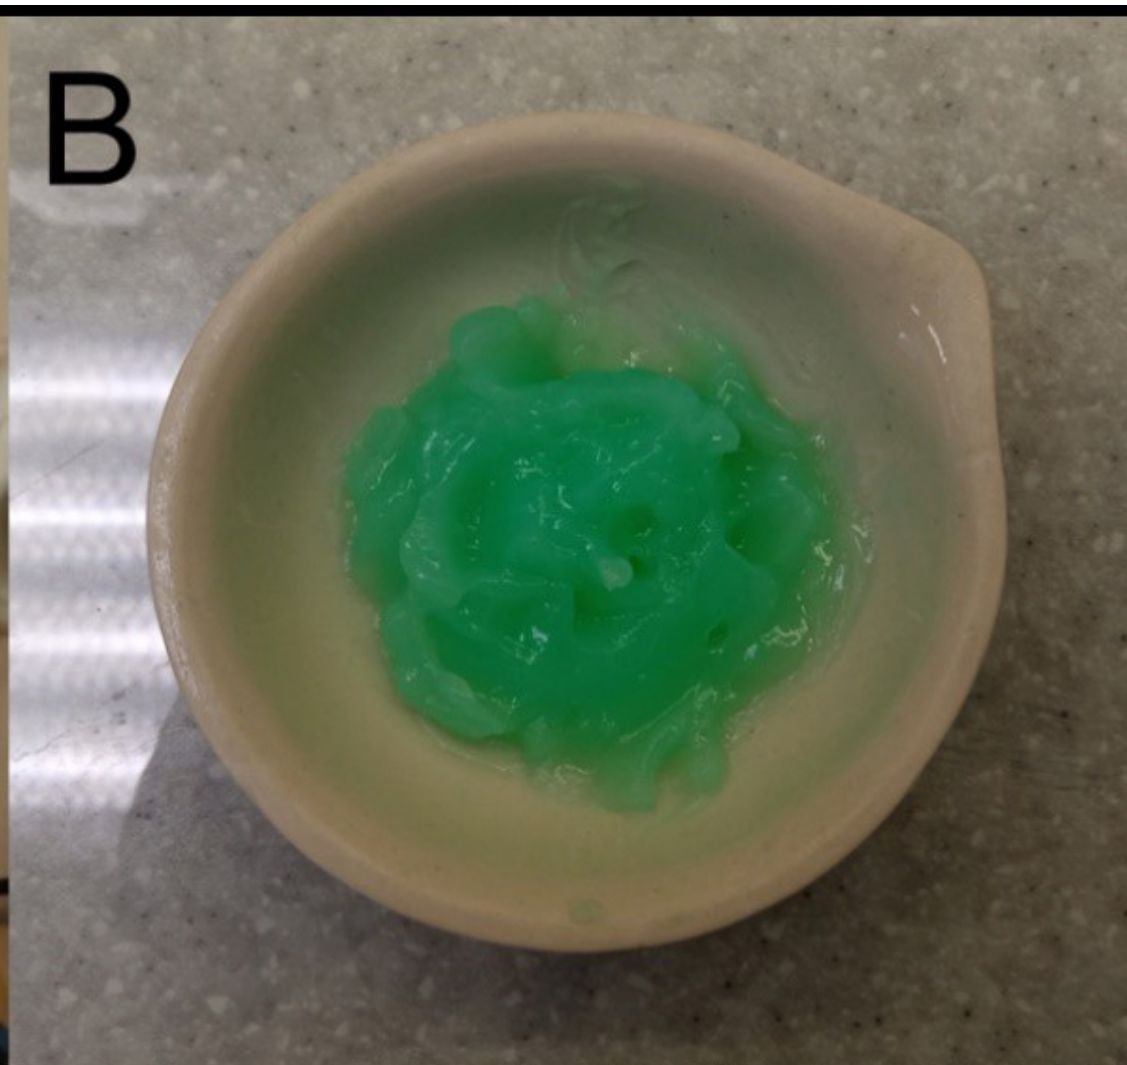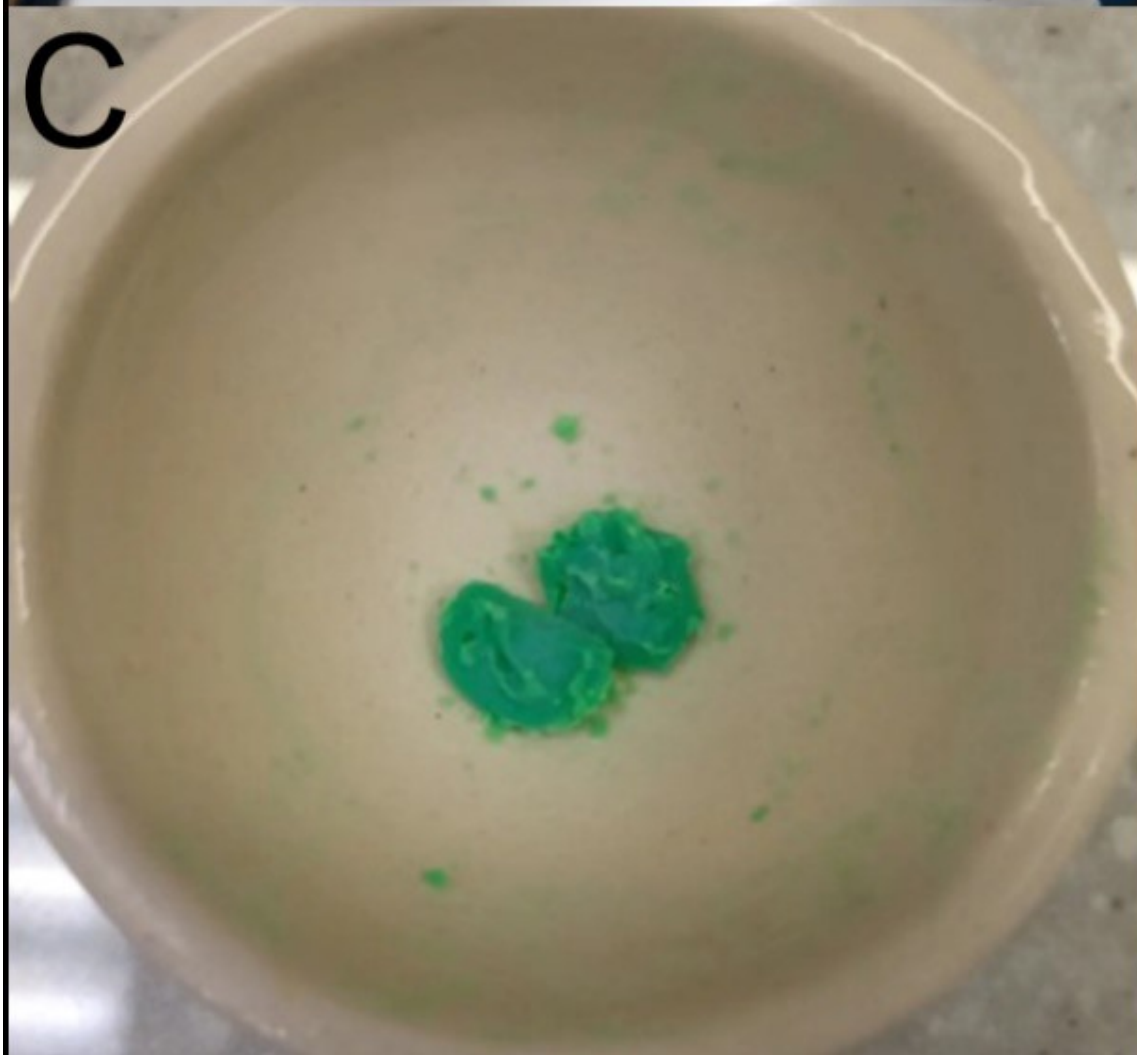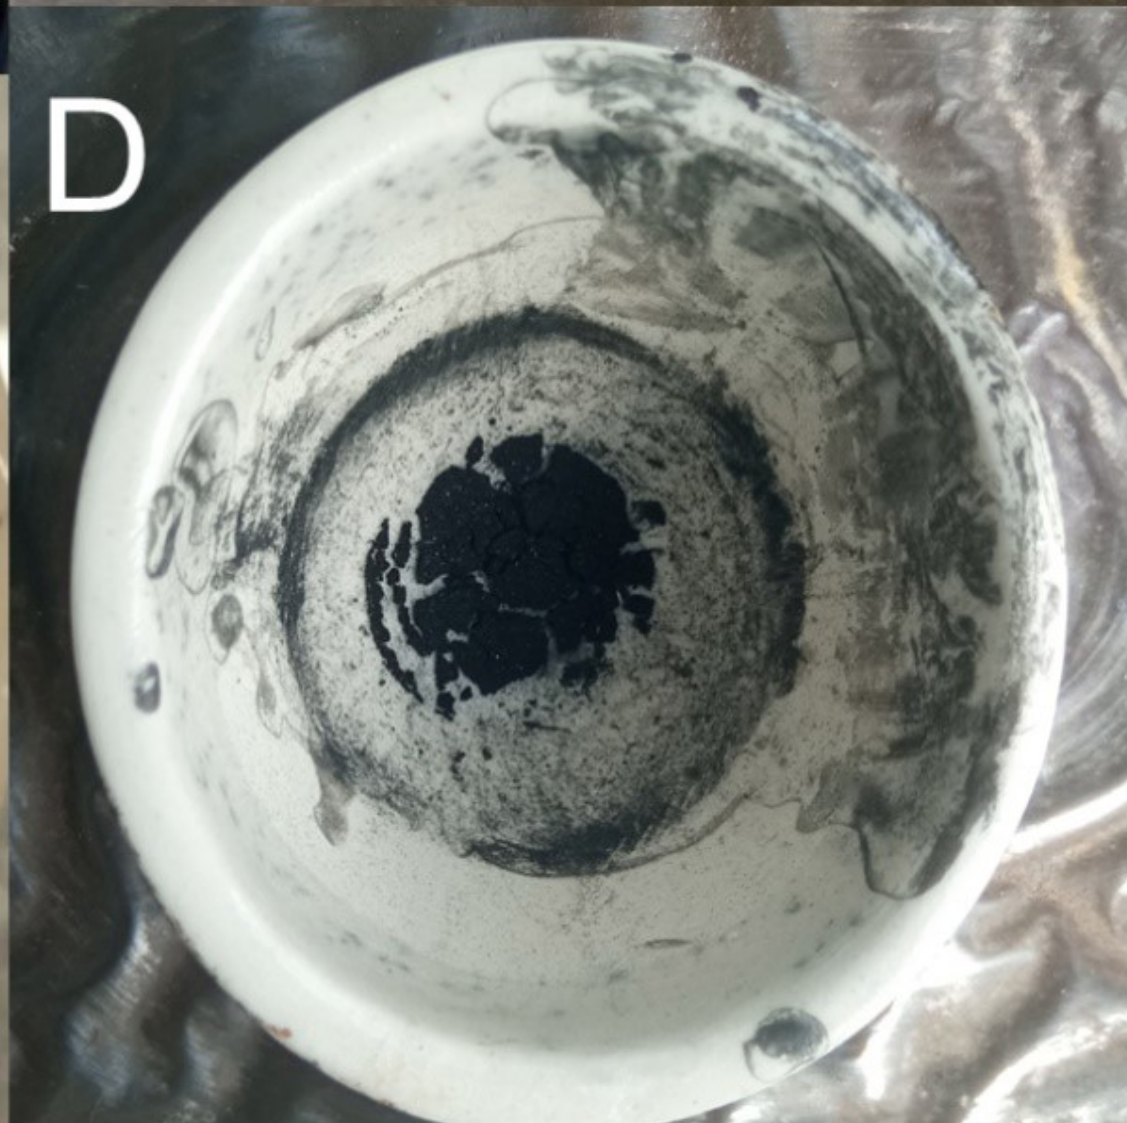

Supplement: d4an01160k3.pdf [file d4an01160k3.pdf]

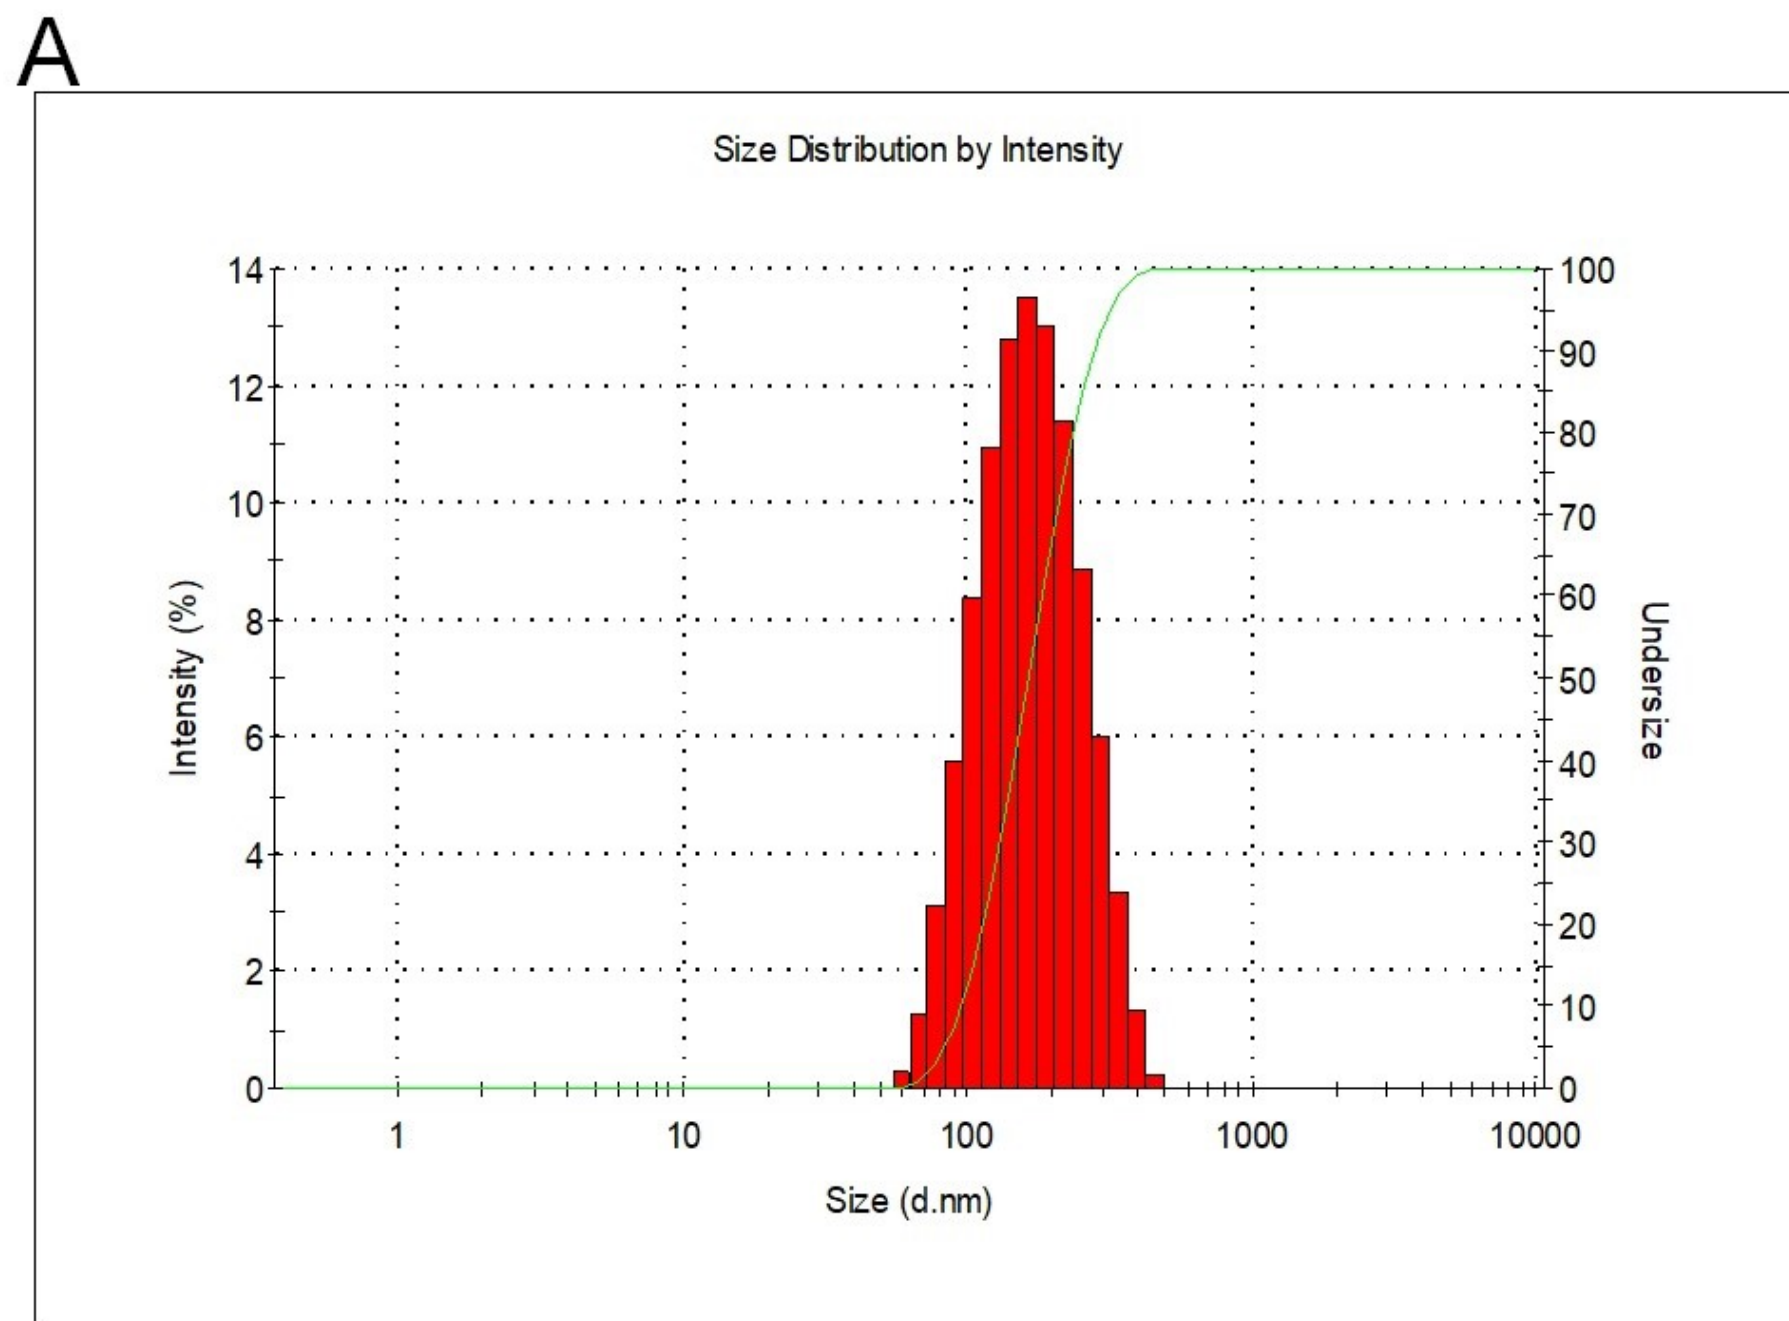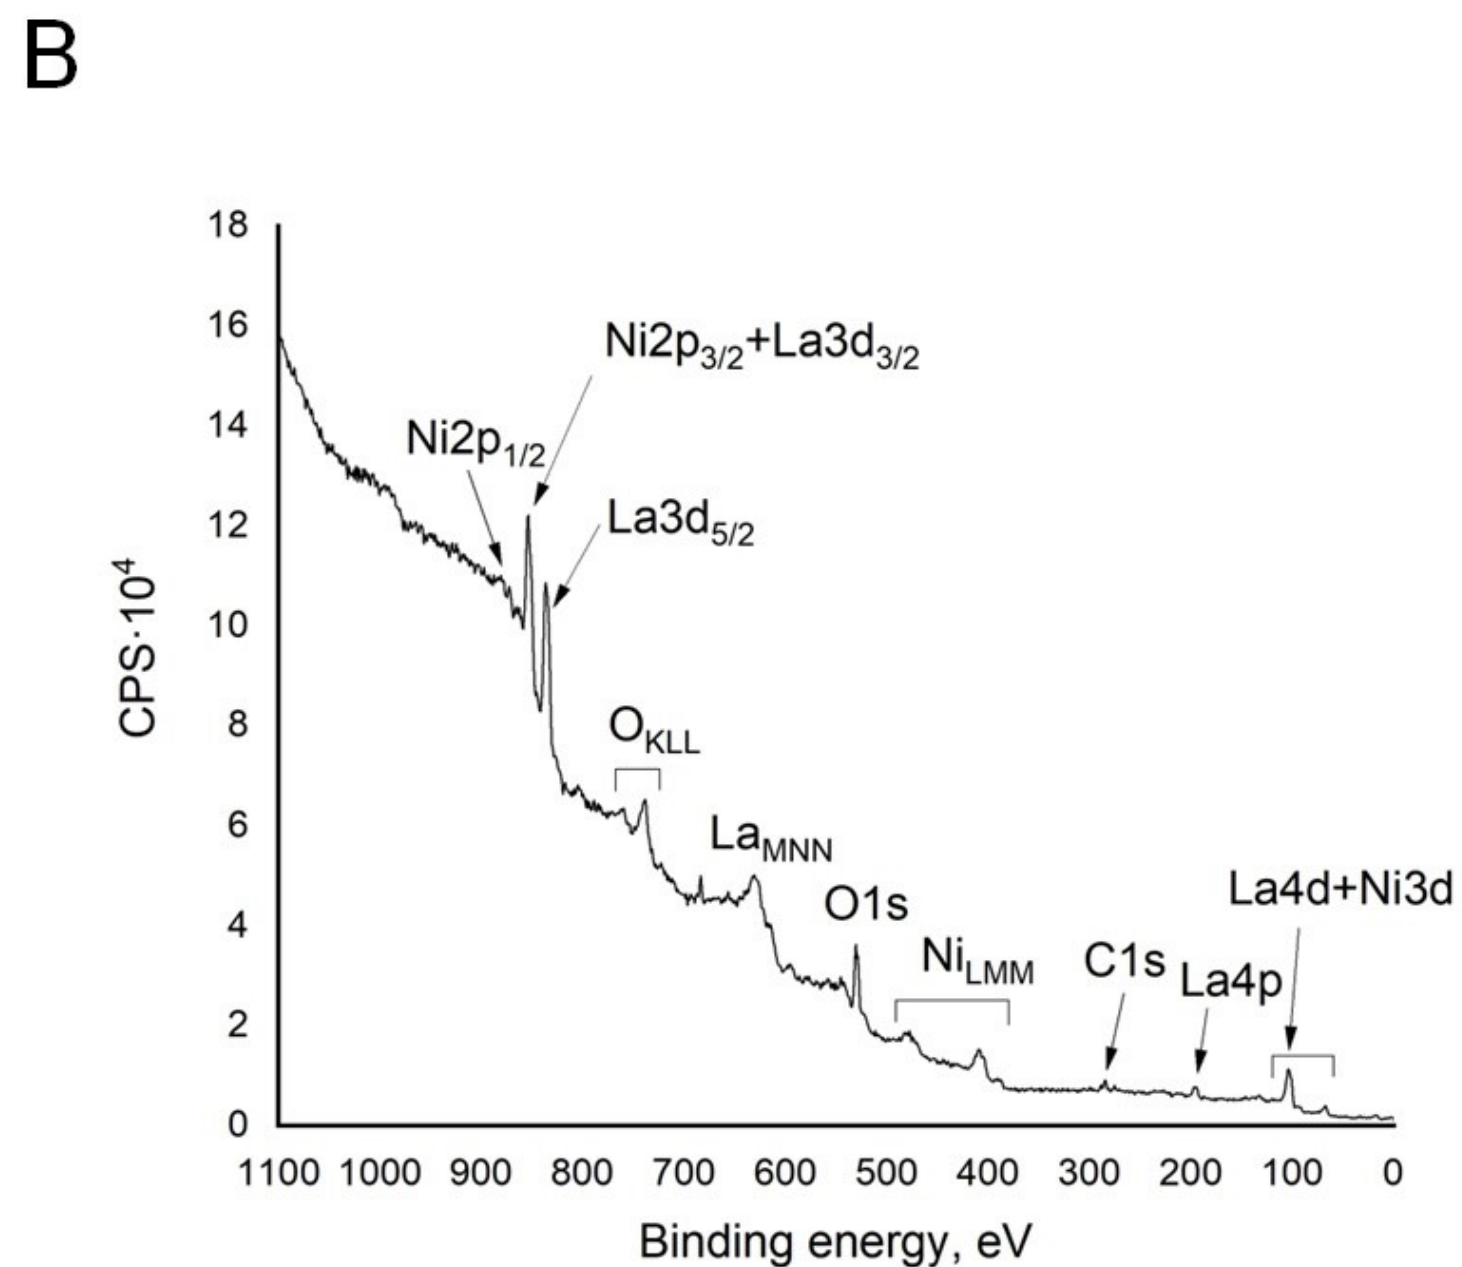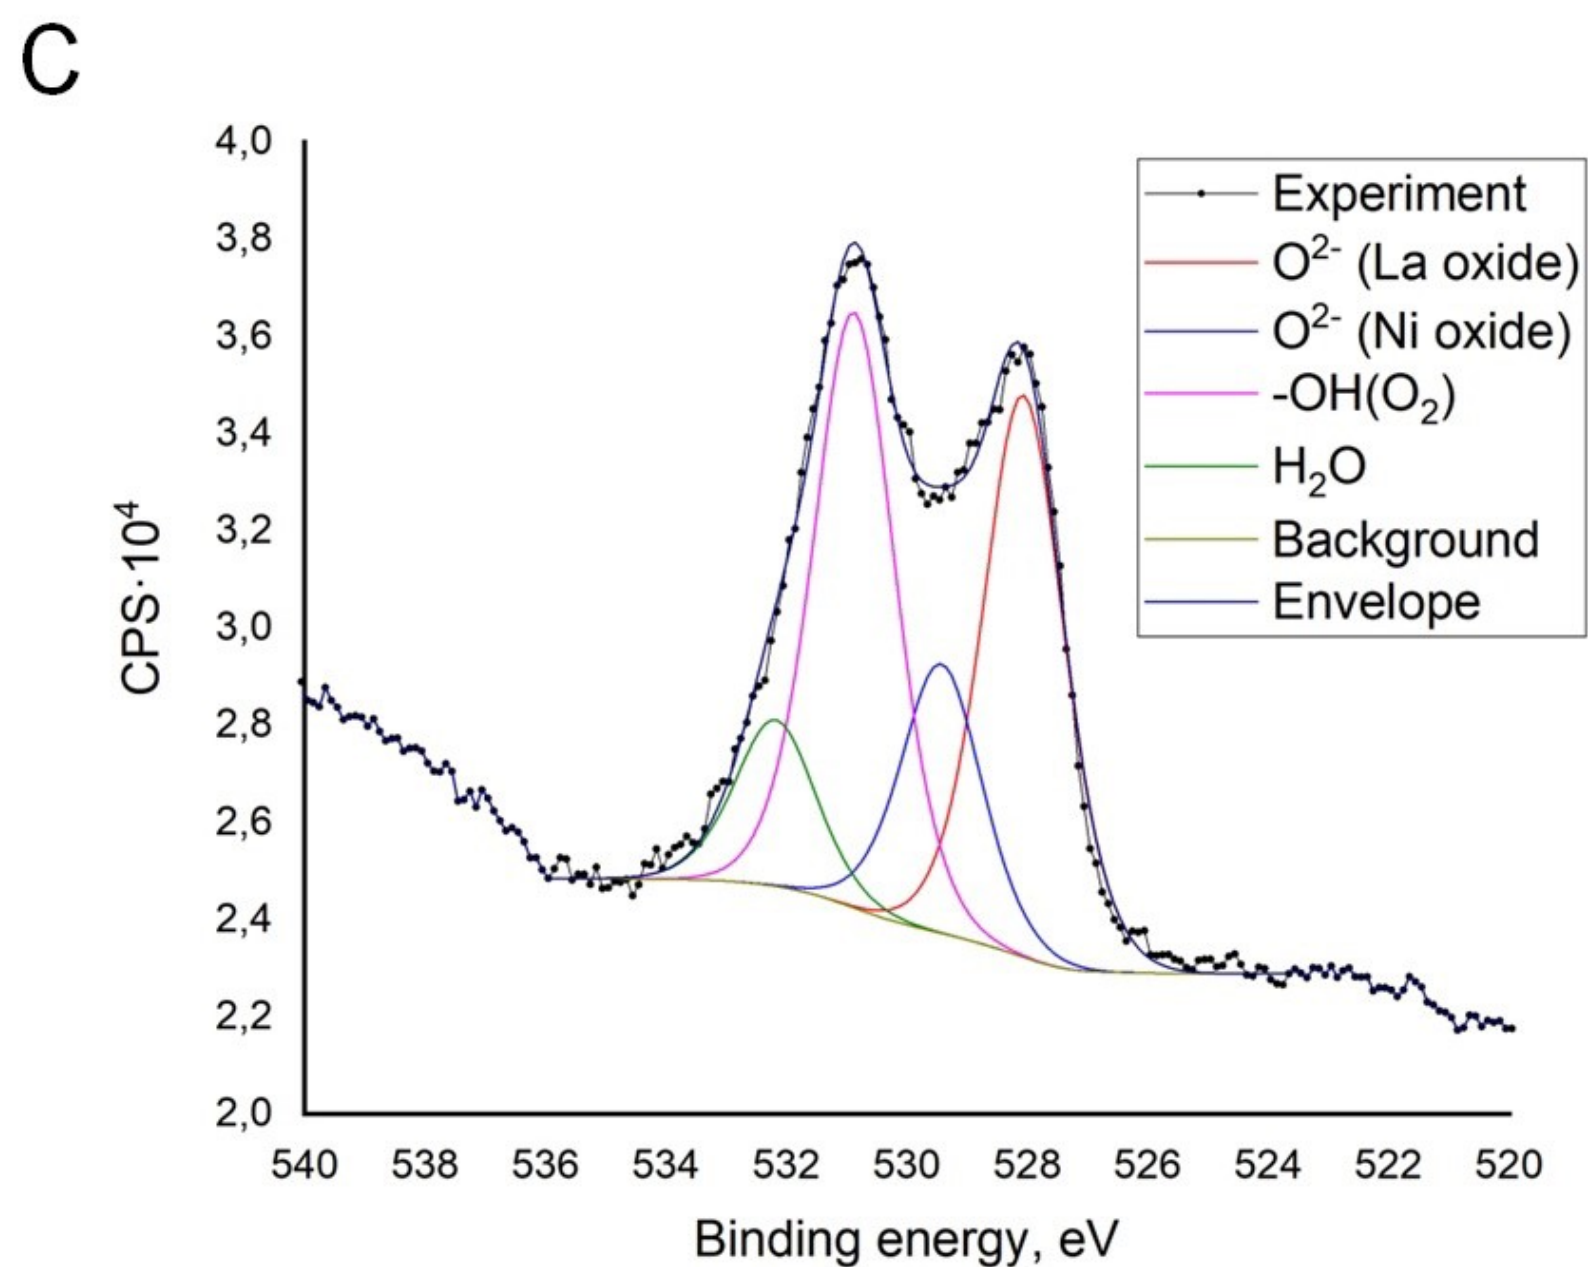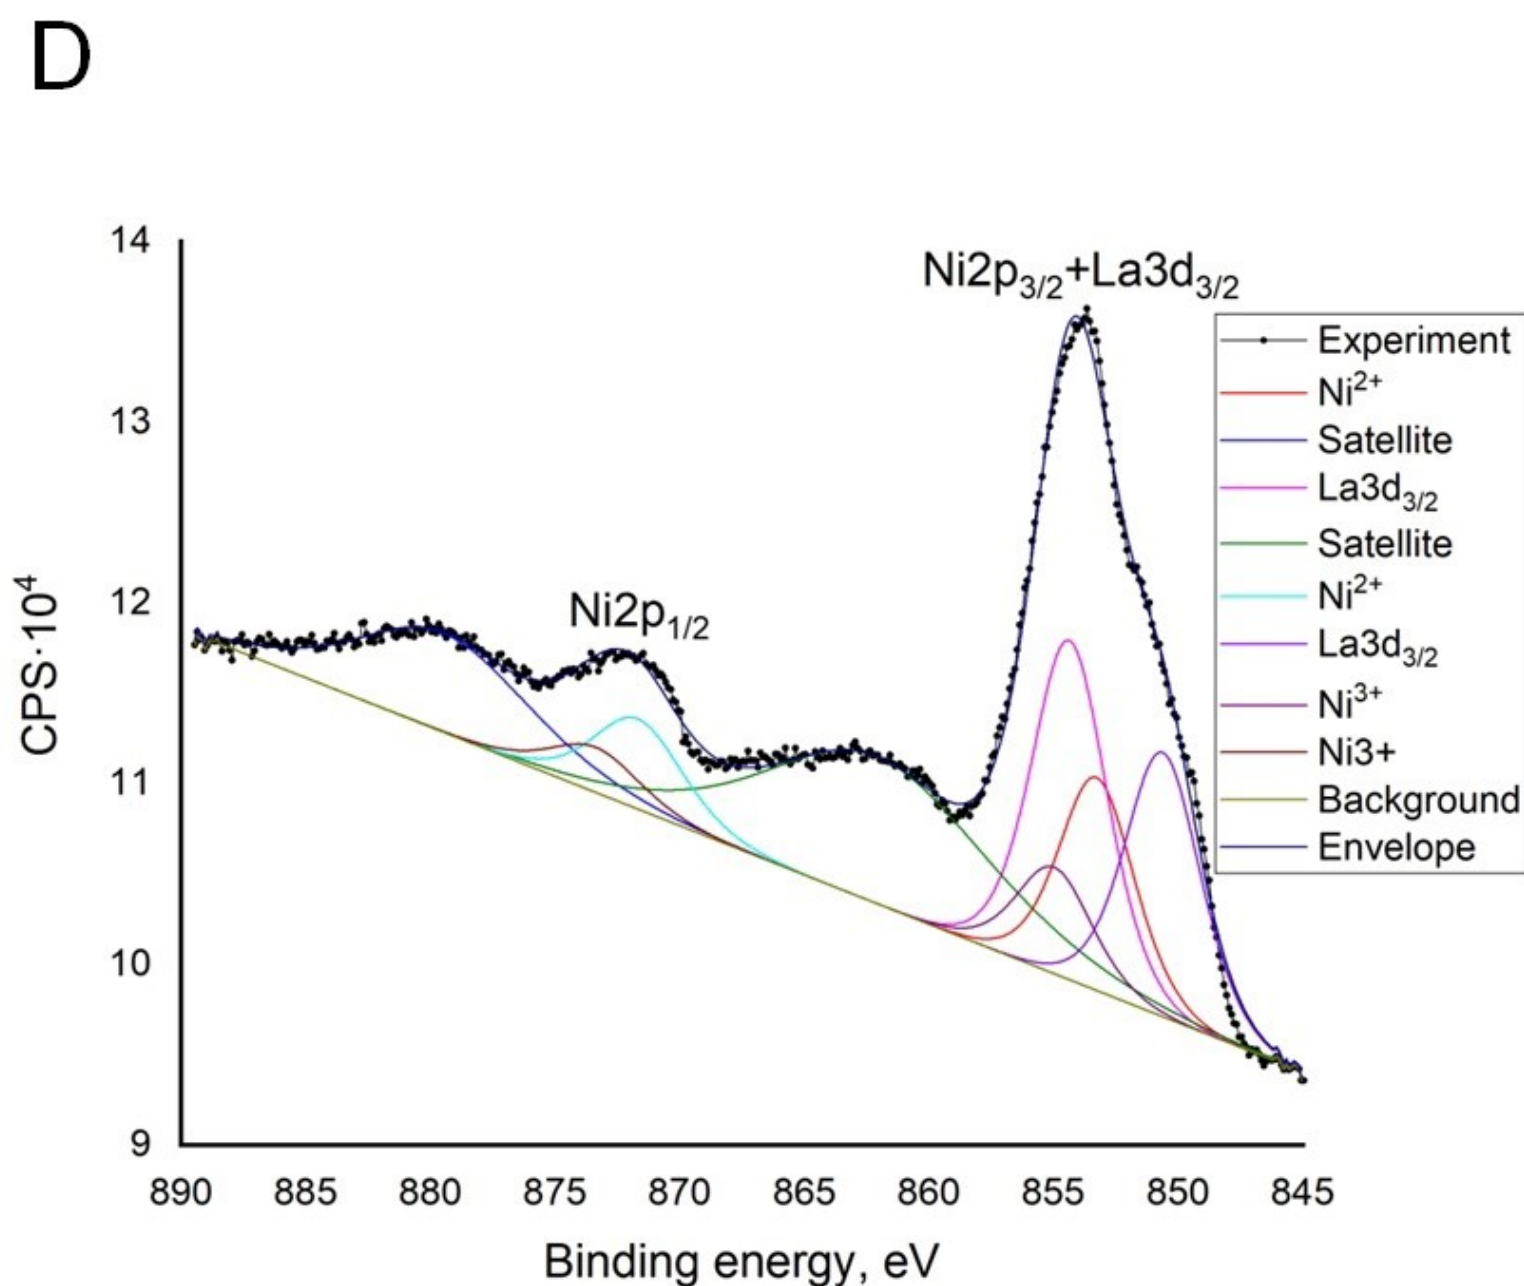

Supplement: d4an01160k4.pdf [file d4an01160k4.pdf]

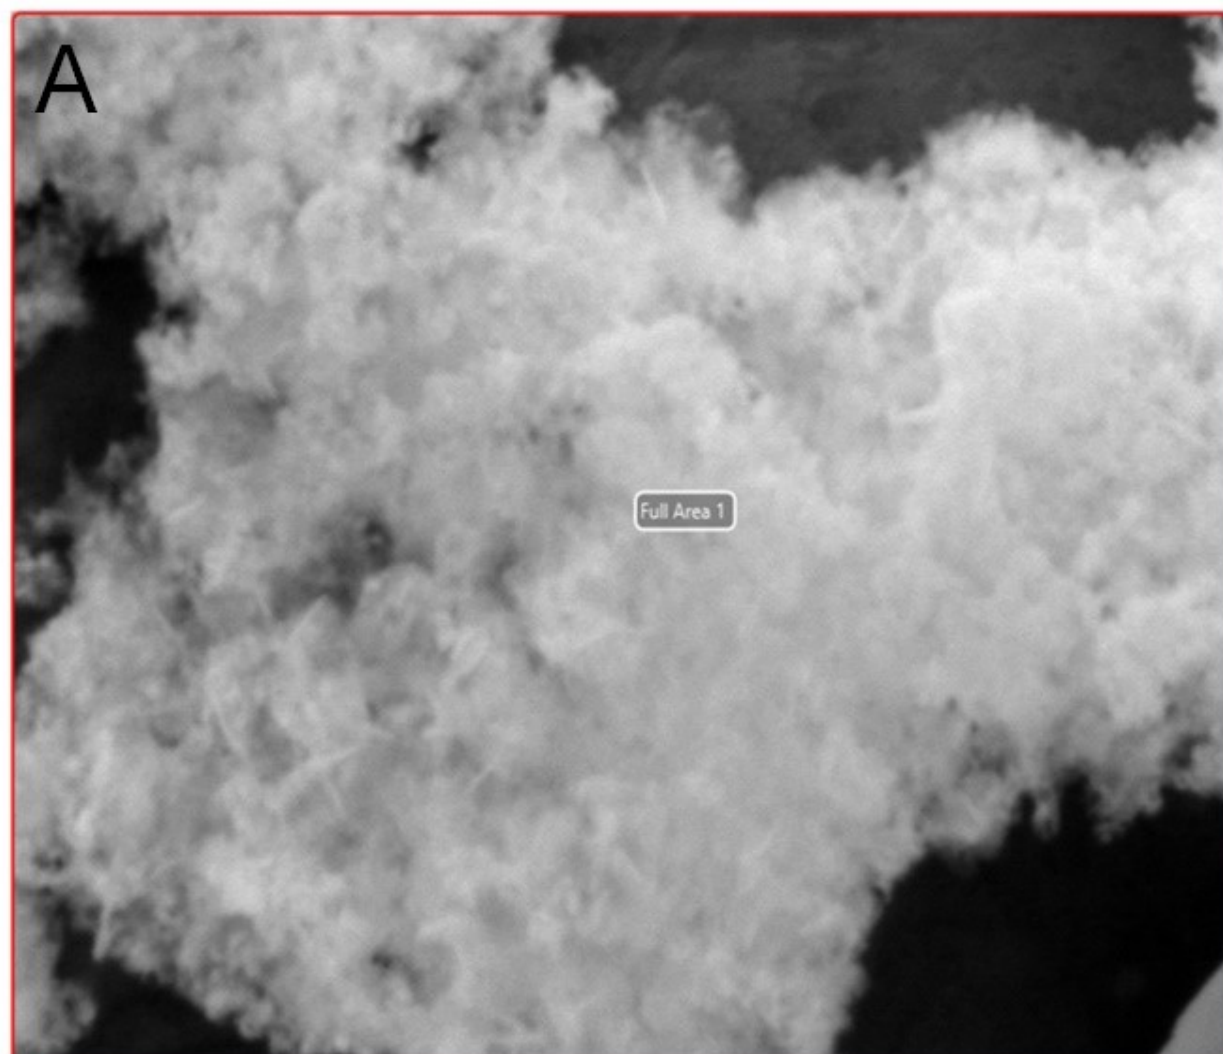

**B**

| Element | Weight % | Atomic % | Error % |
|---------|----------|----------|---------|
| C       | 4.0      | 9.6      | 12.3    |
| O       | 14.7     | 26.9     | 7.6     |
| Mg      | 1.4      | 1.7      | 8.6     |
| Al      | 48.0     | 52.1     | 5.0     |
| Ni      | 10.3     | 5.1      | 7.1     |
| La      | 21.6     | 4.5      | 9.8     |

**C**

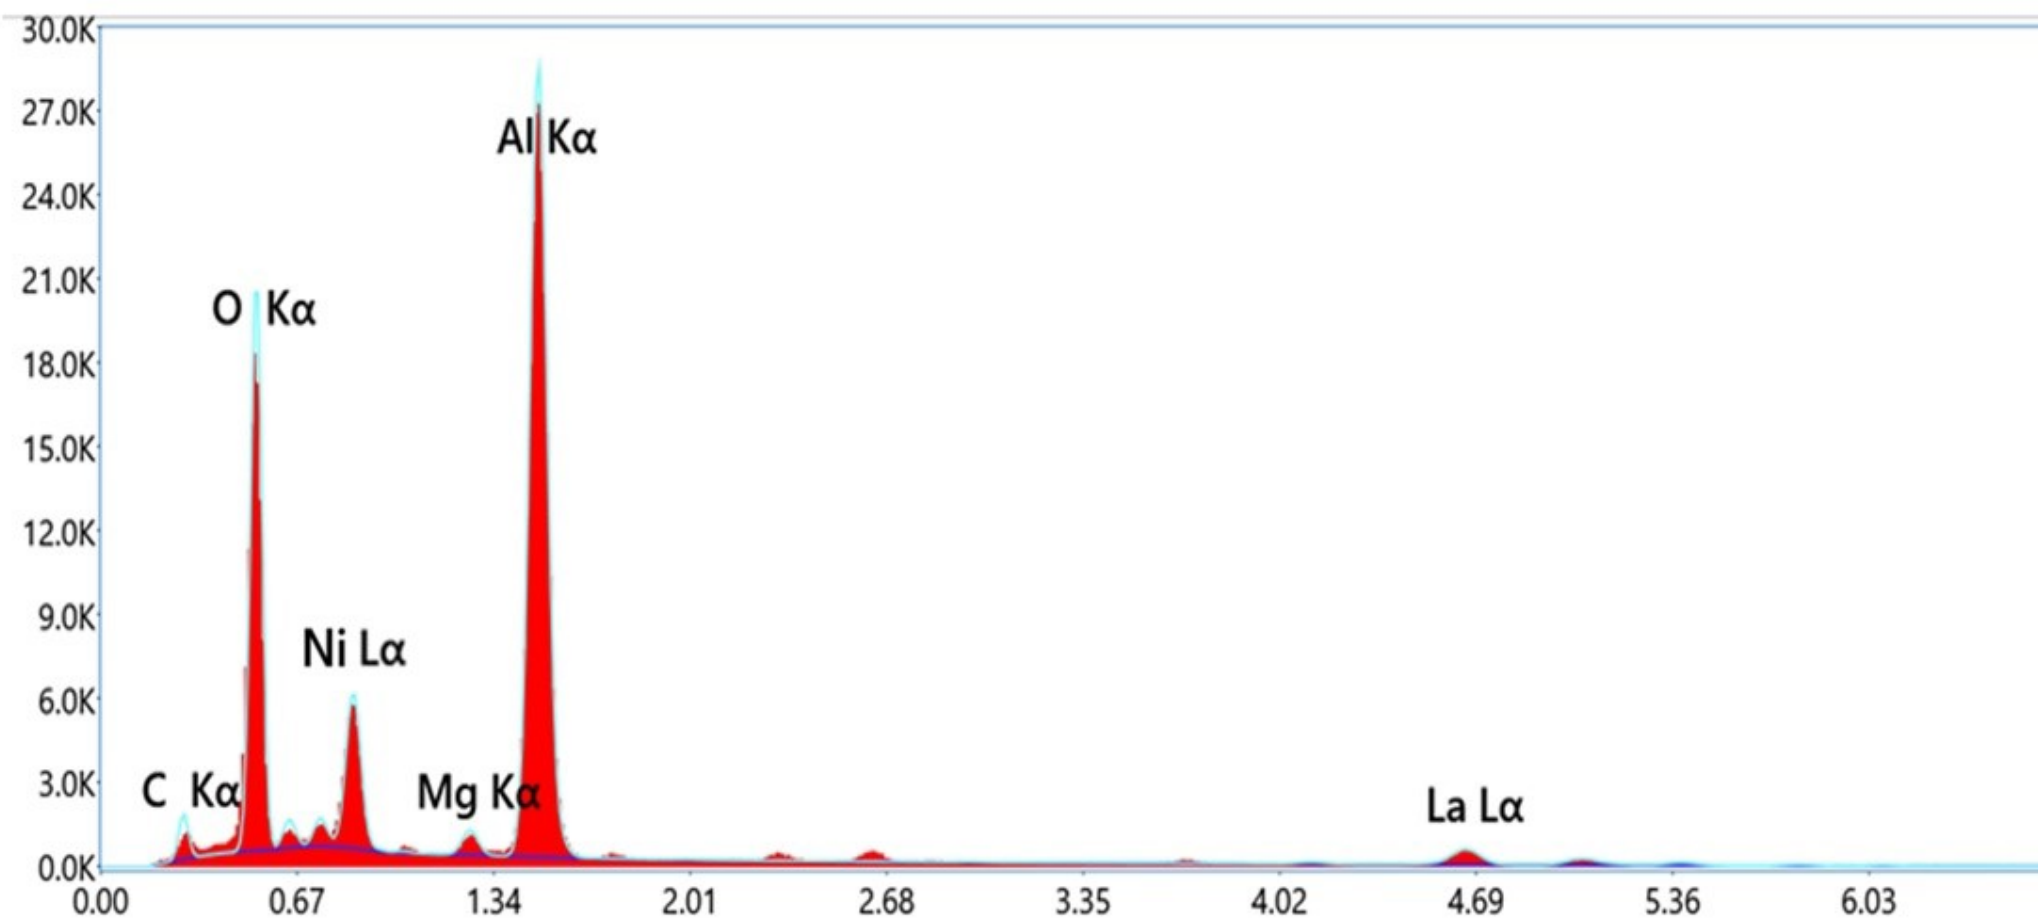

Supplement: d4an01160k5.pdf [file d4an01160k5.pdf]

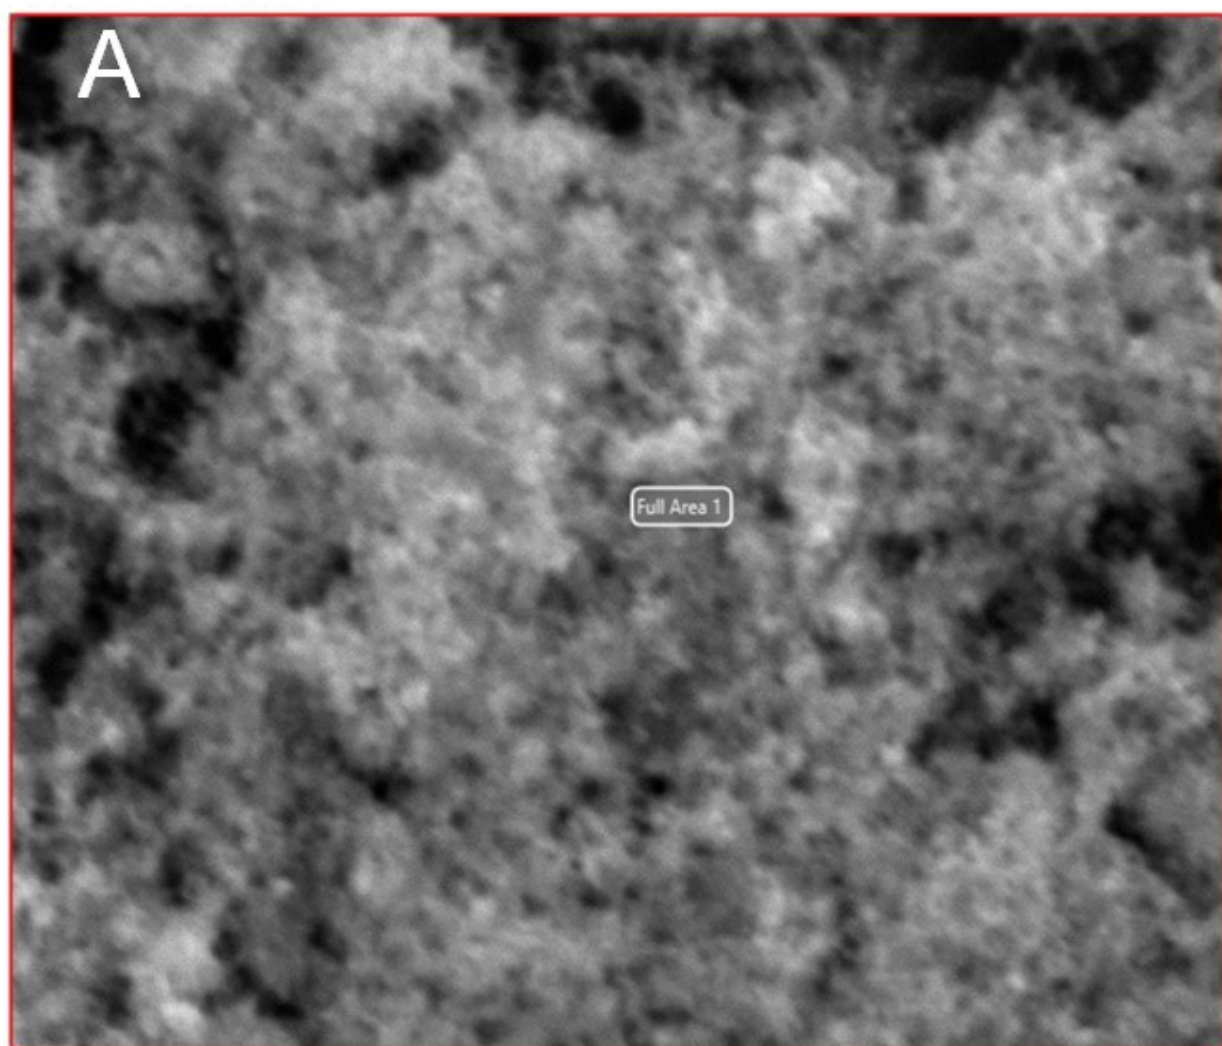

1  $\mu\text{m}$  Mag:54080 WD : 10

B

| Element | Weight % | Atomic % | Error % |
|---------|----------|----------|---------|
| C       | 16.9     | 30.7     | 11.1    |
| N       | 3.6      | 5.7      | 10.8    |
| O       | 9.4      | 12.9     | 8.6     |
| Mg      | 0.8      | 0.7      | 7.0     |
| Al      | 56.8     | 46.0     | 3.8     |
| P       | 2.5      | 1.7      | 6.5     |
| Ni      | 3.5      | 1.3      | 7.2     |
| La      | 6.4      | 1.0      | 9.0     |

C

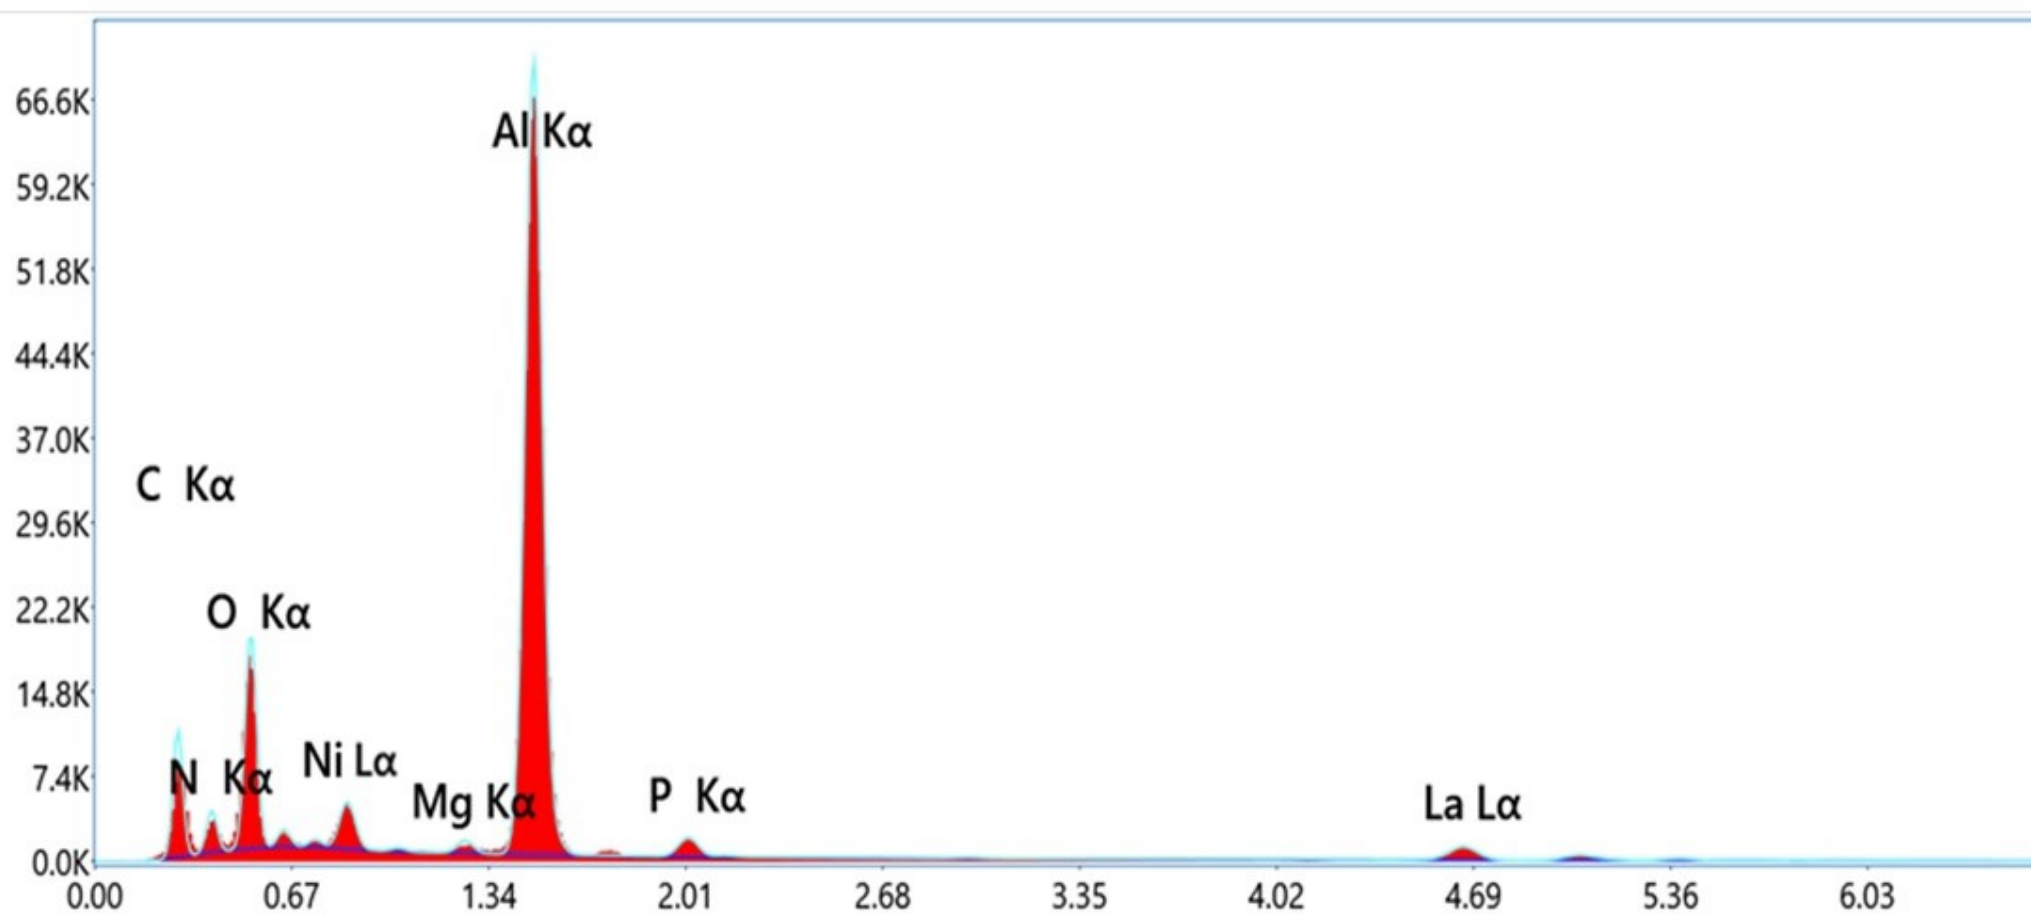

Supplement: d4an01160k7.pdf [file d4an01160k7.pdf]

**A**

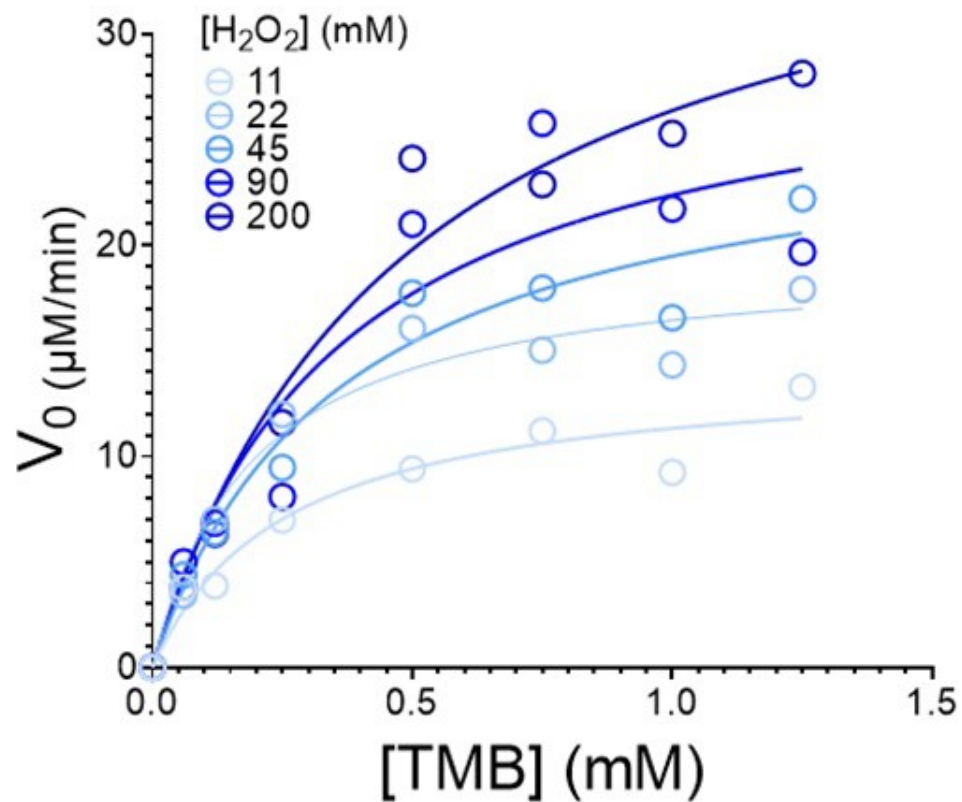

**B**

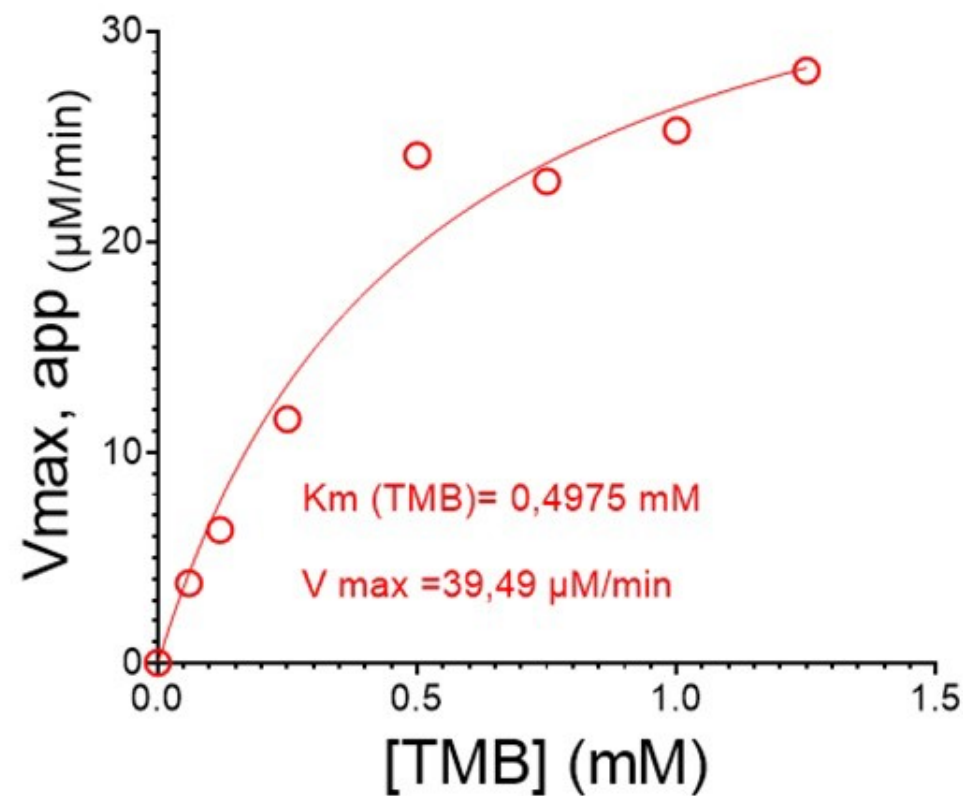

**C**

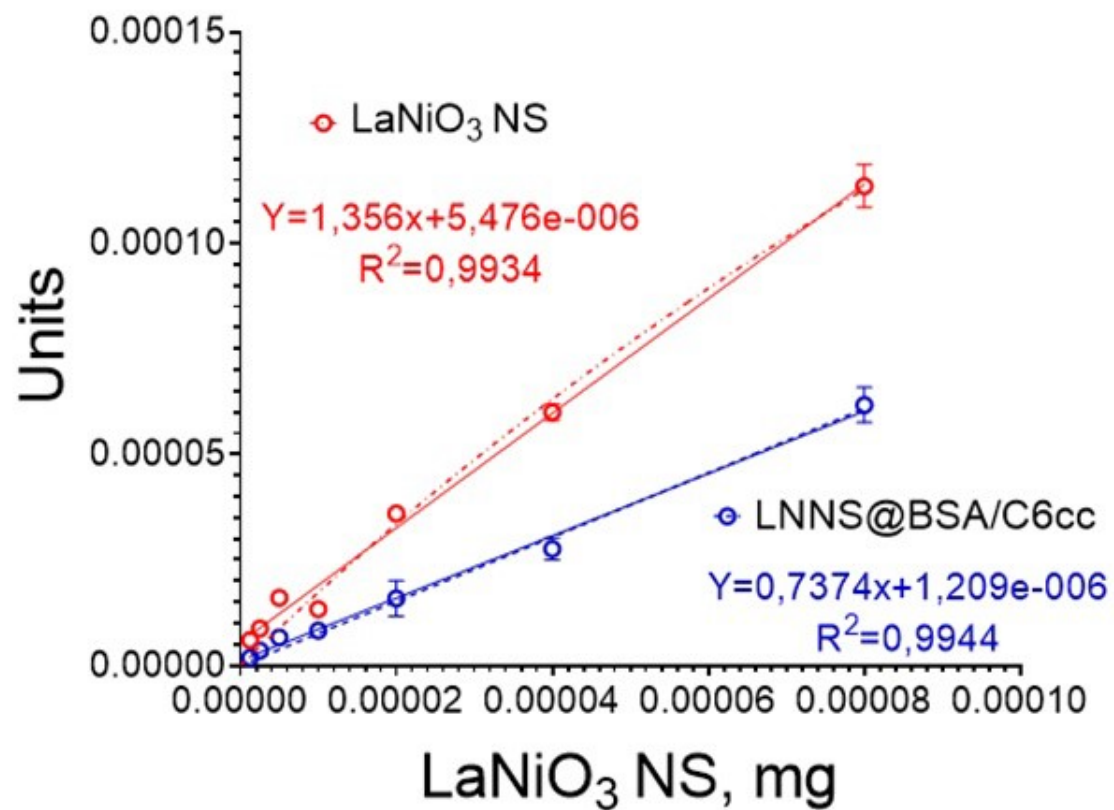

**D**

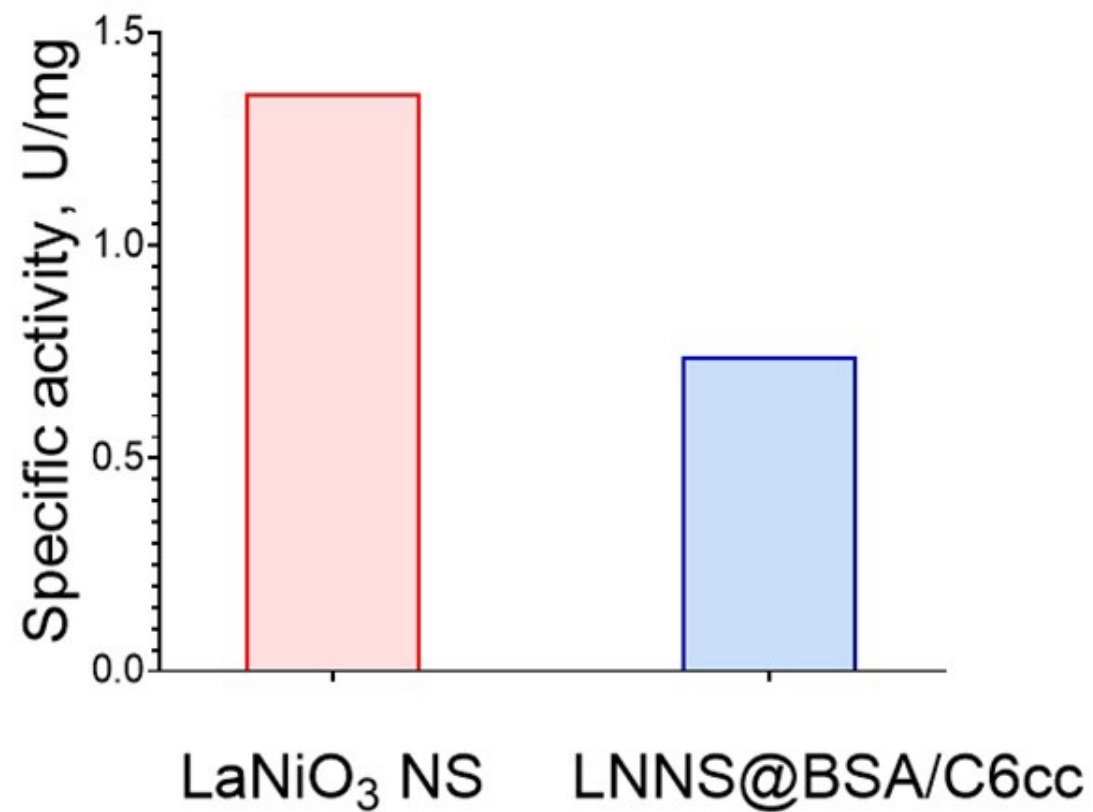

Supplement: d4an01160k8.pdf [file d4an01160k8.pdf]

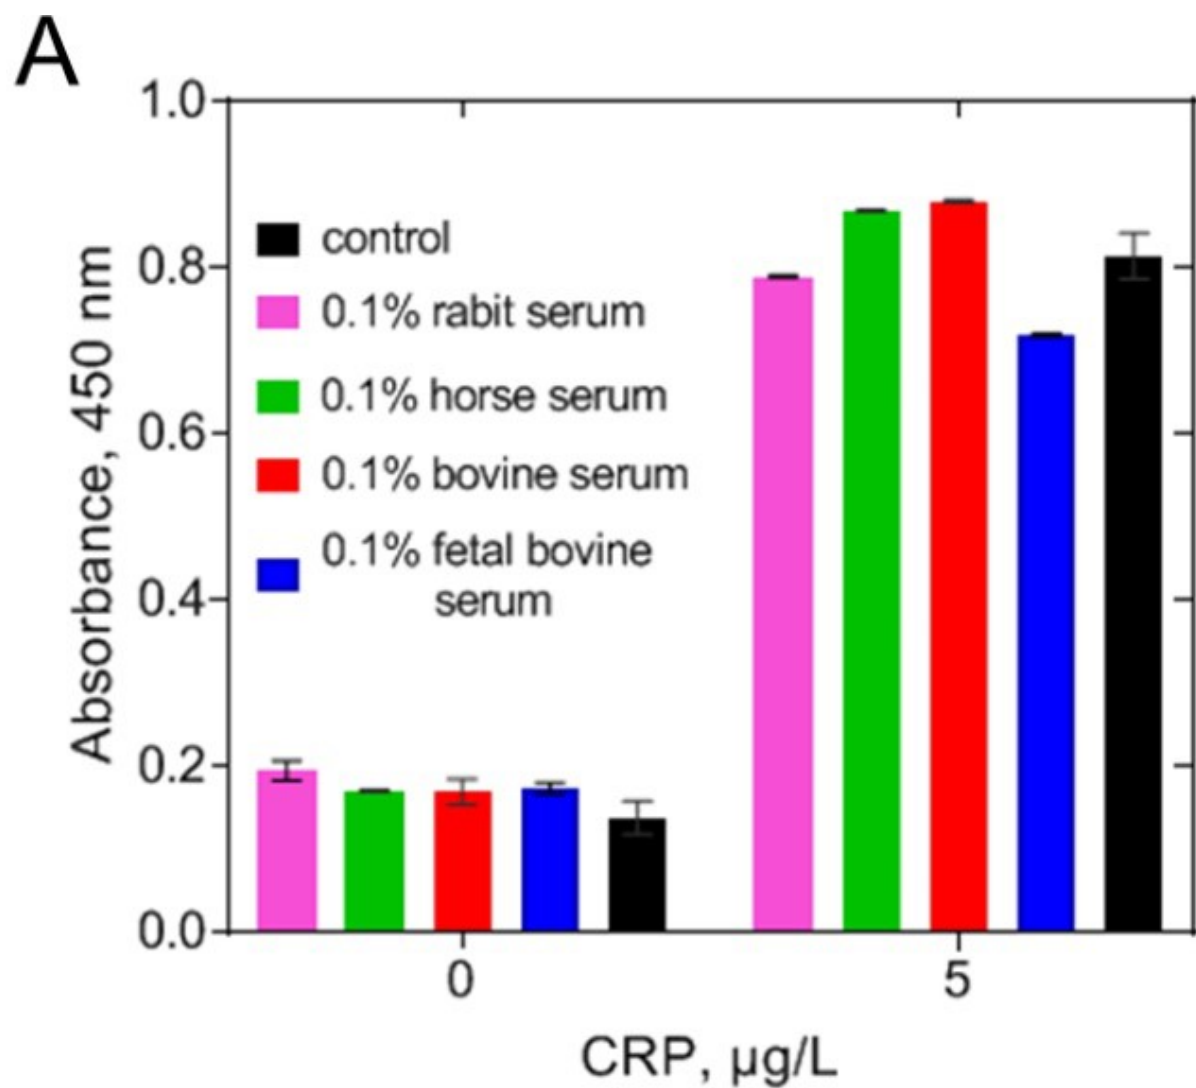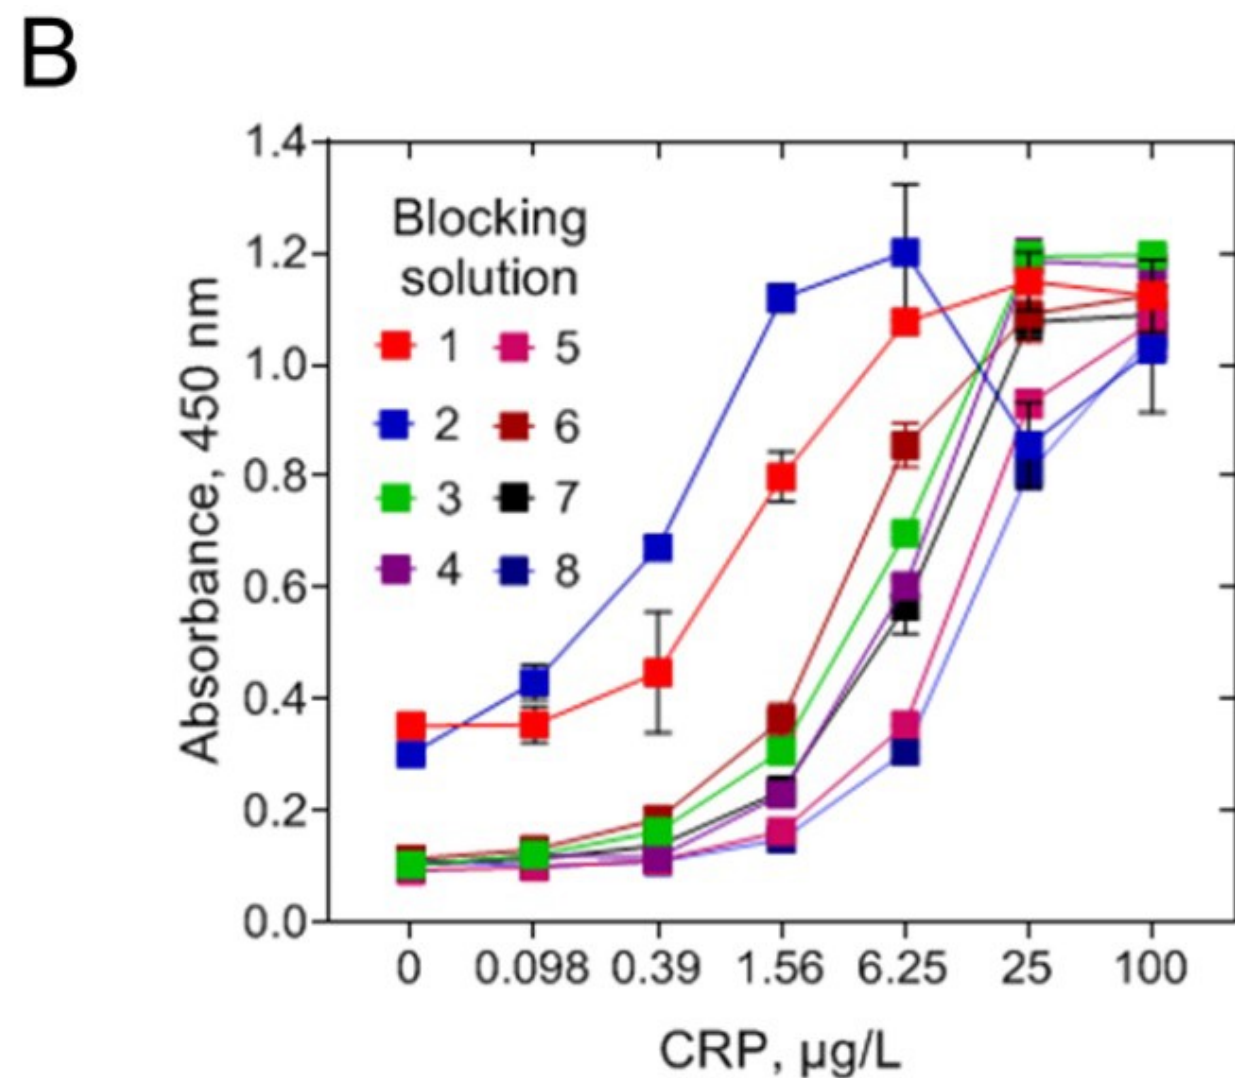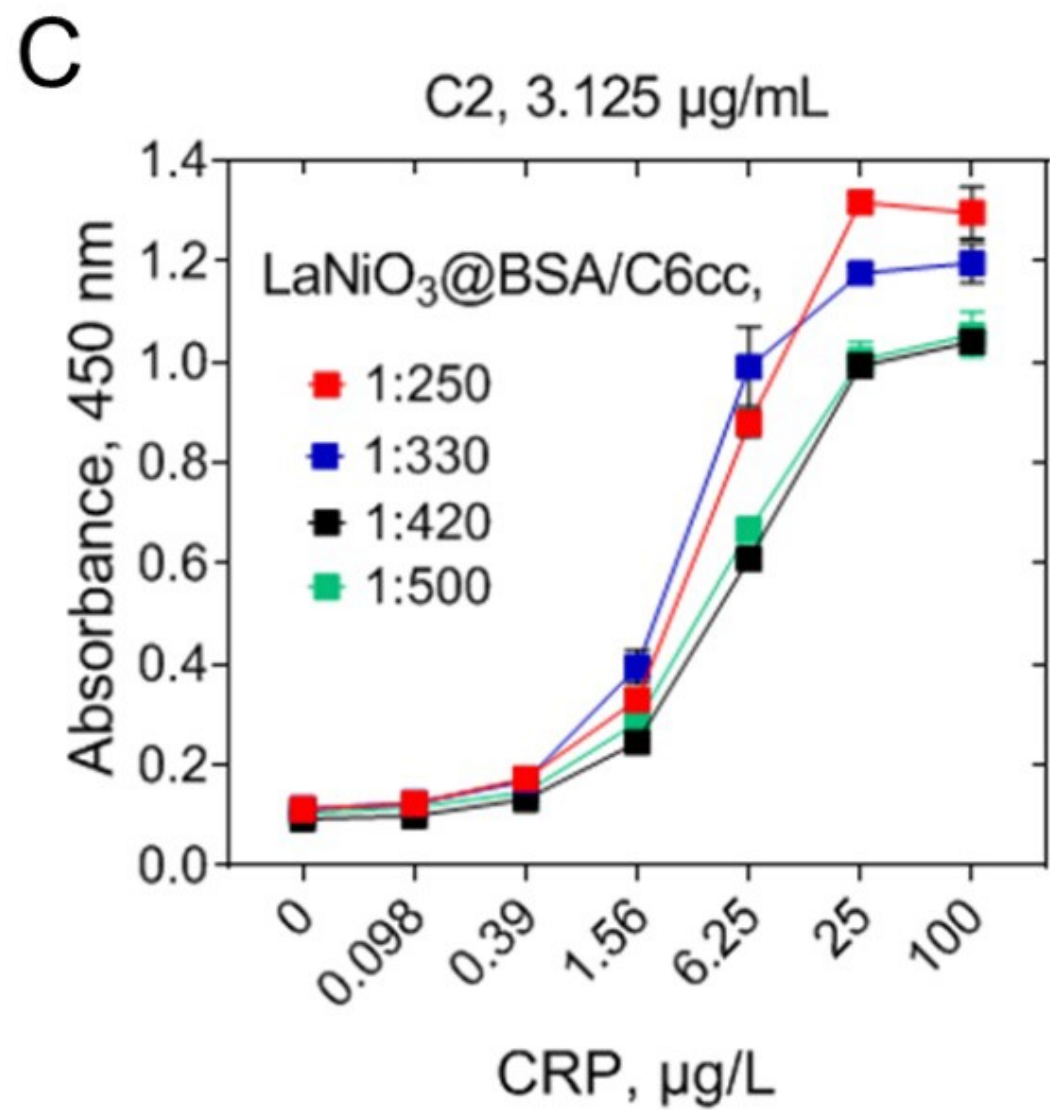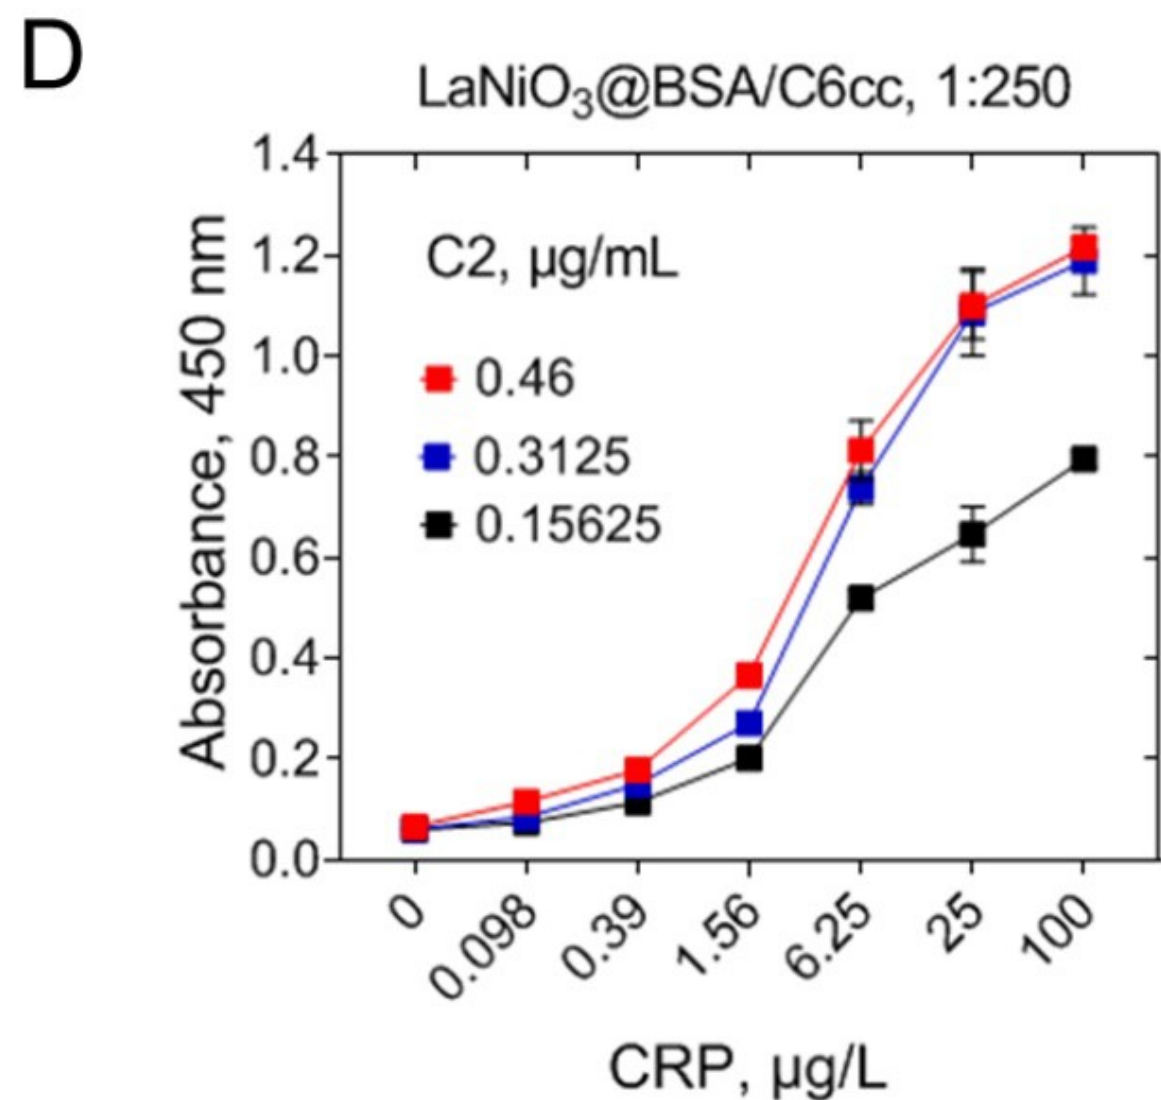

Supplement: d4an01160k9.pdf [file d4an01160k9.pdf]
